# Supplementary material for: Structural basis of the activation of type 1 insulin-like growth factor receptor
Source: PubMed Central journal article supplement (PMC6783537; doi:10.1038/s41467-019-12564-0), 2019-10-08
Supplement: 41467_2019_12564_MOESM1_ESM.pdf [file 41467_2019_12564_MOESM1_ESM.pdf]

**Supplementary Information**

**Structural basis of the activation of type 1 insulin-like growth factor receptor**

*Li et al.*

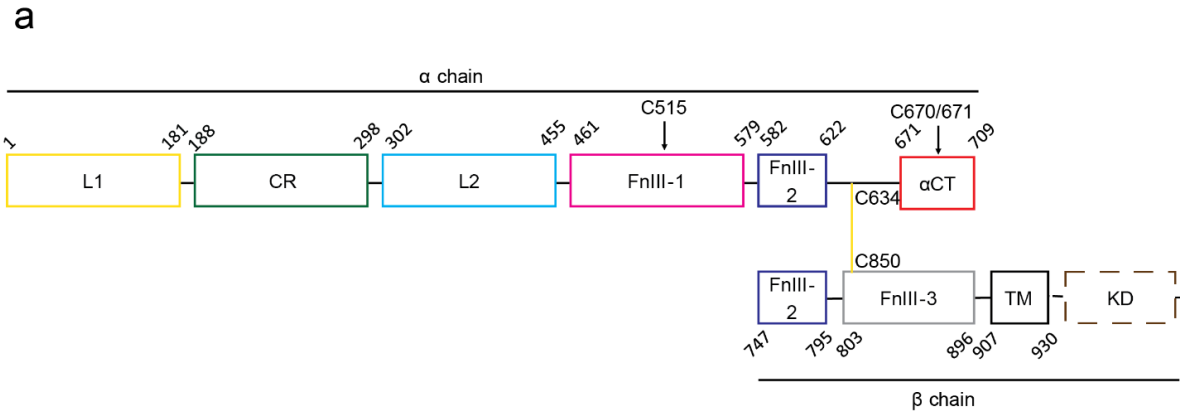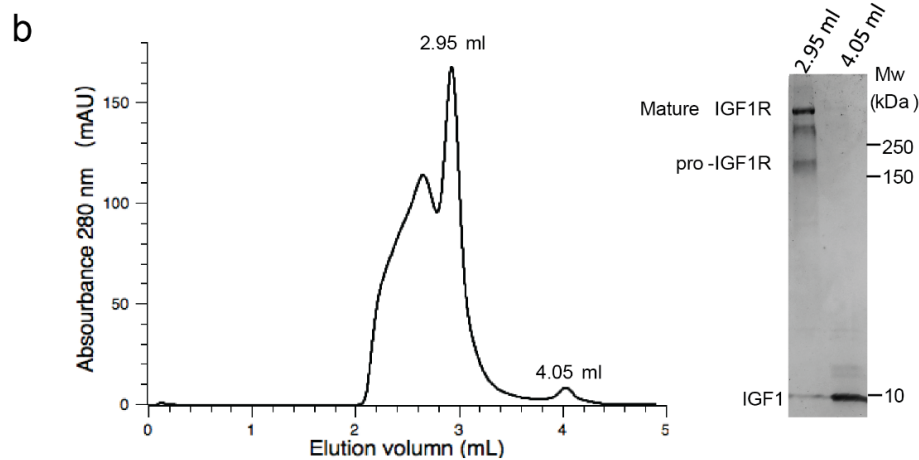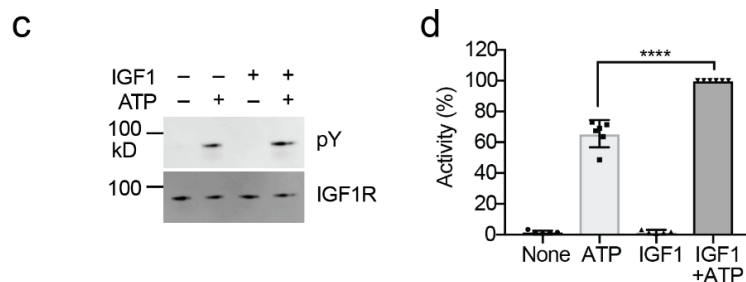

**Supplementary Fig. 1 | Purification of the full-length MmIGF1R.** **a**, Domain organization of IGF1R. **b**, Representative size-exclusion chromatogram of IR. The peak fractions were visualized on SDS-PAGE by Coomassie staining. **c**, *In vitro* phosphorylation assay using the recombinant mouse IGF1R isolated with detergent. **d**, Quantification of the *in vitro* phosphorylation assay shown in **c** (Mean  $\pm$  SD). Each experiment was repeated six times. Significance calculated using two-tailed students *t*-test; \*\*\*\**p*<0.0001. Source data are provided as a Source Data file.

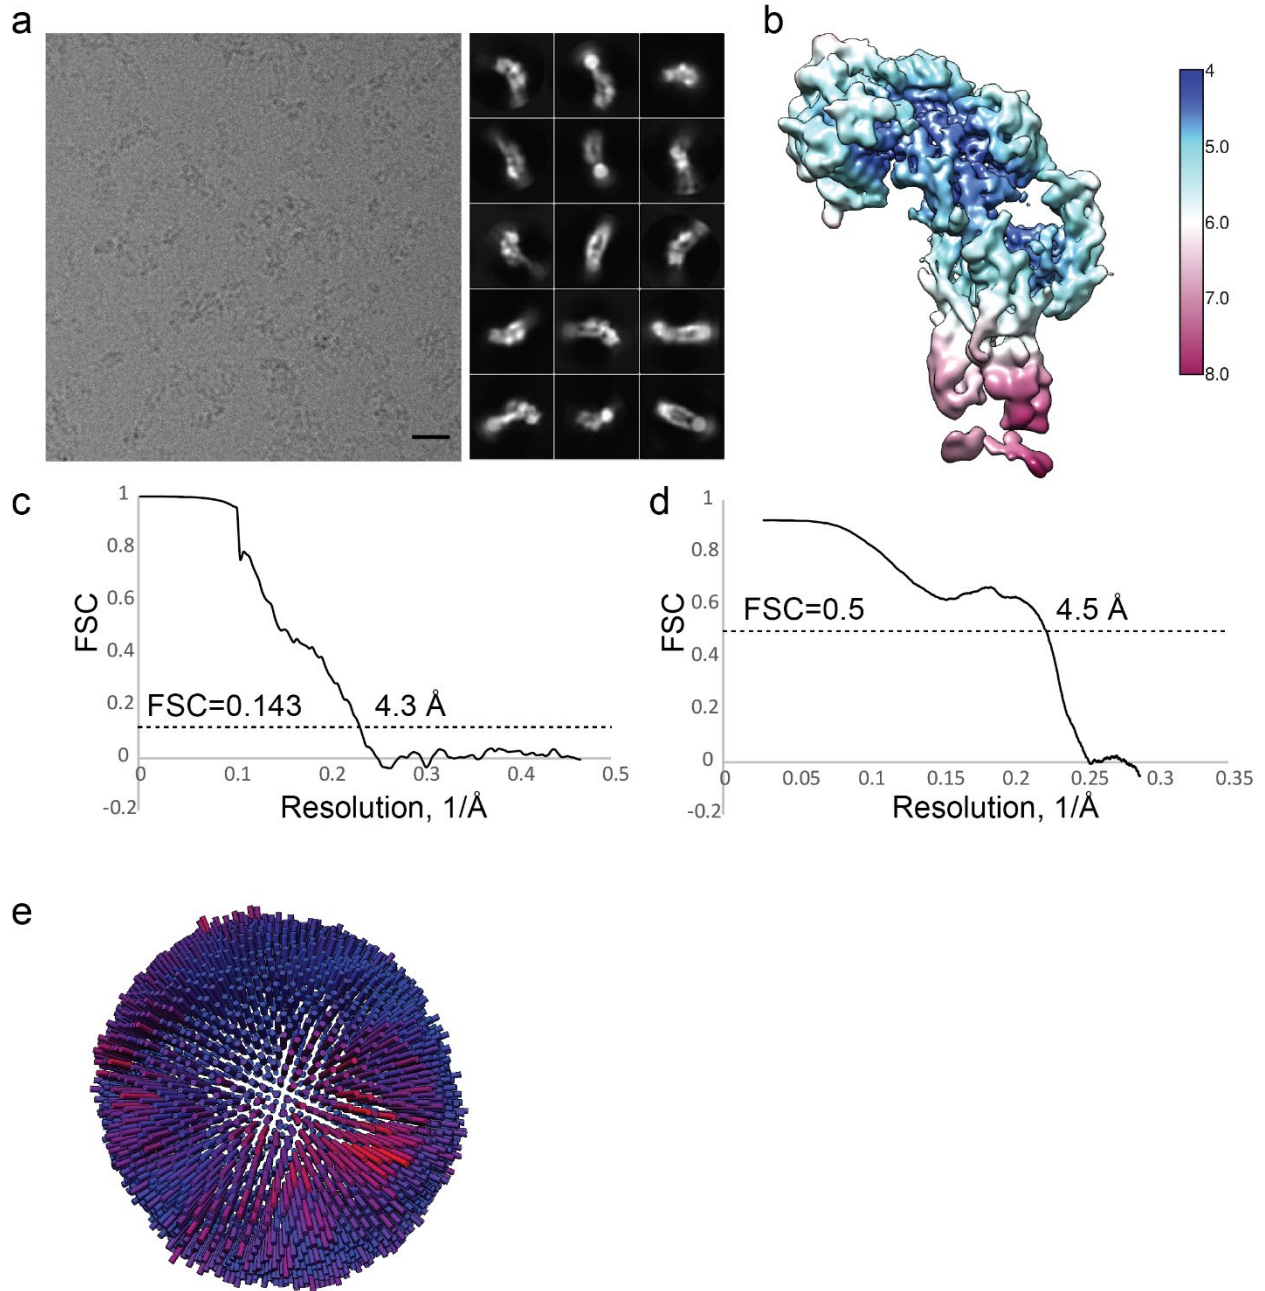

**Supplementary Fig. 2 | Cryo-EM analysis of the IGF1R-IGF1 complex.** **a**, Representative electron micrograph and 2D class averages of the IGF1R-IGF1 complex. **b**, unsharpened cryo-EM map colored by local resolution. **c**, The gold-standard Fourier shell correlation curve for the cryo-EM map shown in Fig. 1a. **d**, FSC curves for the refined model versus the map. **e**, Euler angle distribution of particles used in the final 3D reconstructions. Scale bar: 25 nm.

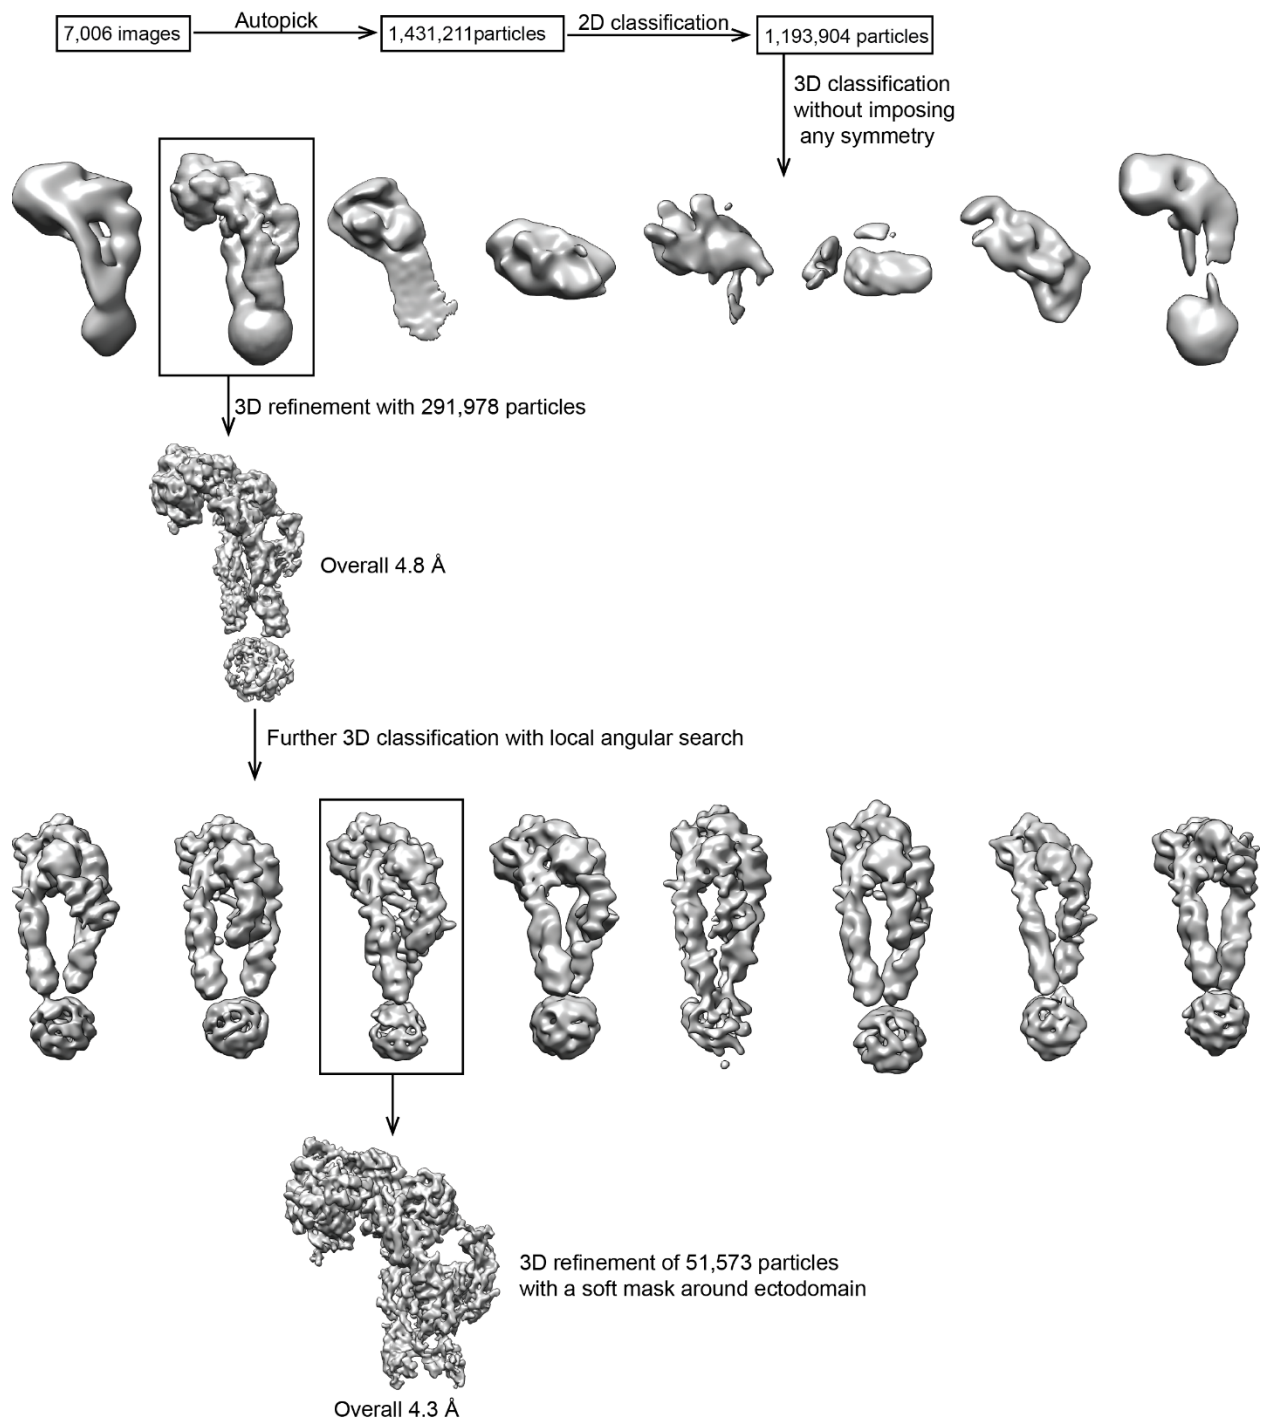

**Supplementary Fig. 3 | Flowchart of cryo-EM data processing.**

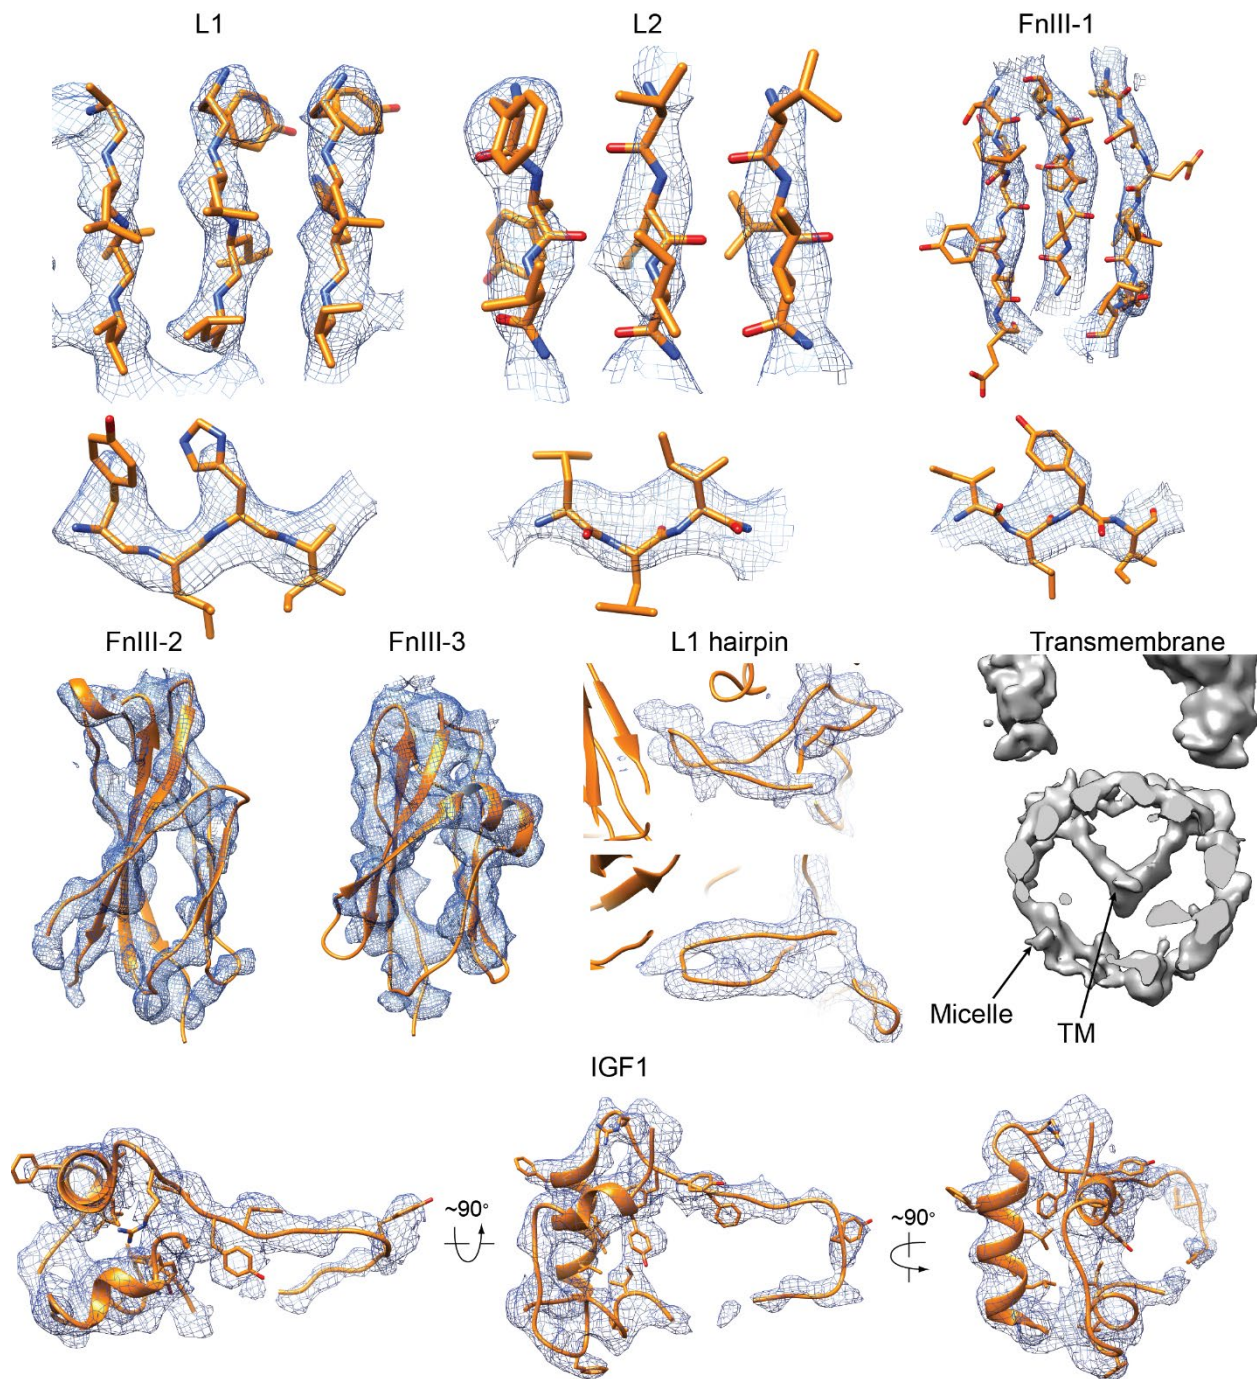

**Supplementary Fig. 4 | Cryo-EM density of the IR–insulin complex. Representative densities of the cryo-EM map of each domain of IGF1R and IGF1 are shown.**

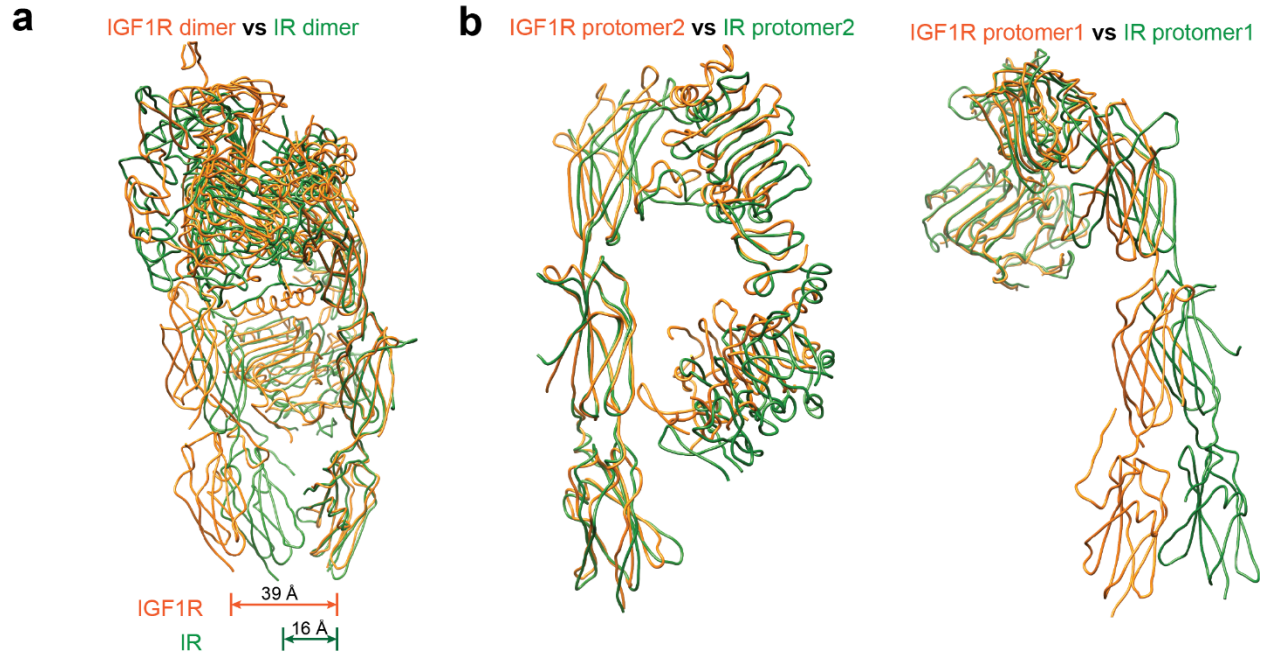

**Supplementary Fig. 5 | Structural comparisons between IGF1R and IR. a,** Superposition between IGF1R dimer (orange) and IR dimer (green). **b,** Superposition between IGF1R protomers (orange) and IR protomers (green).

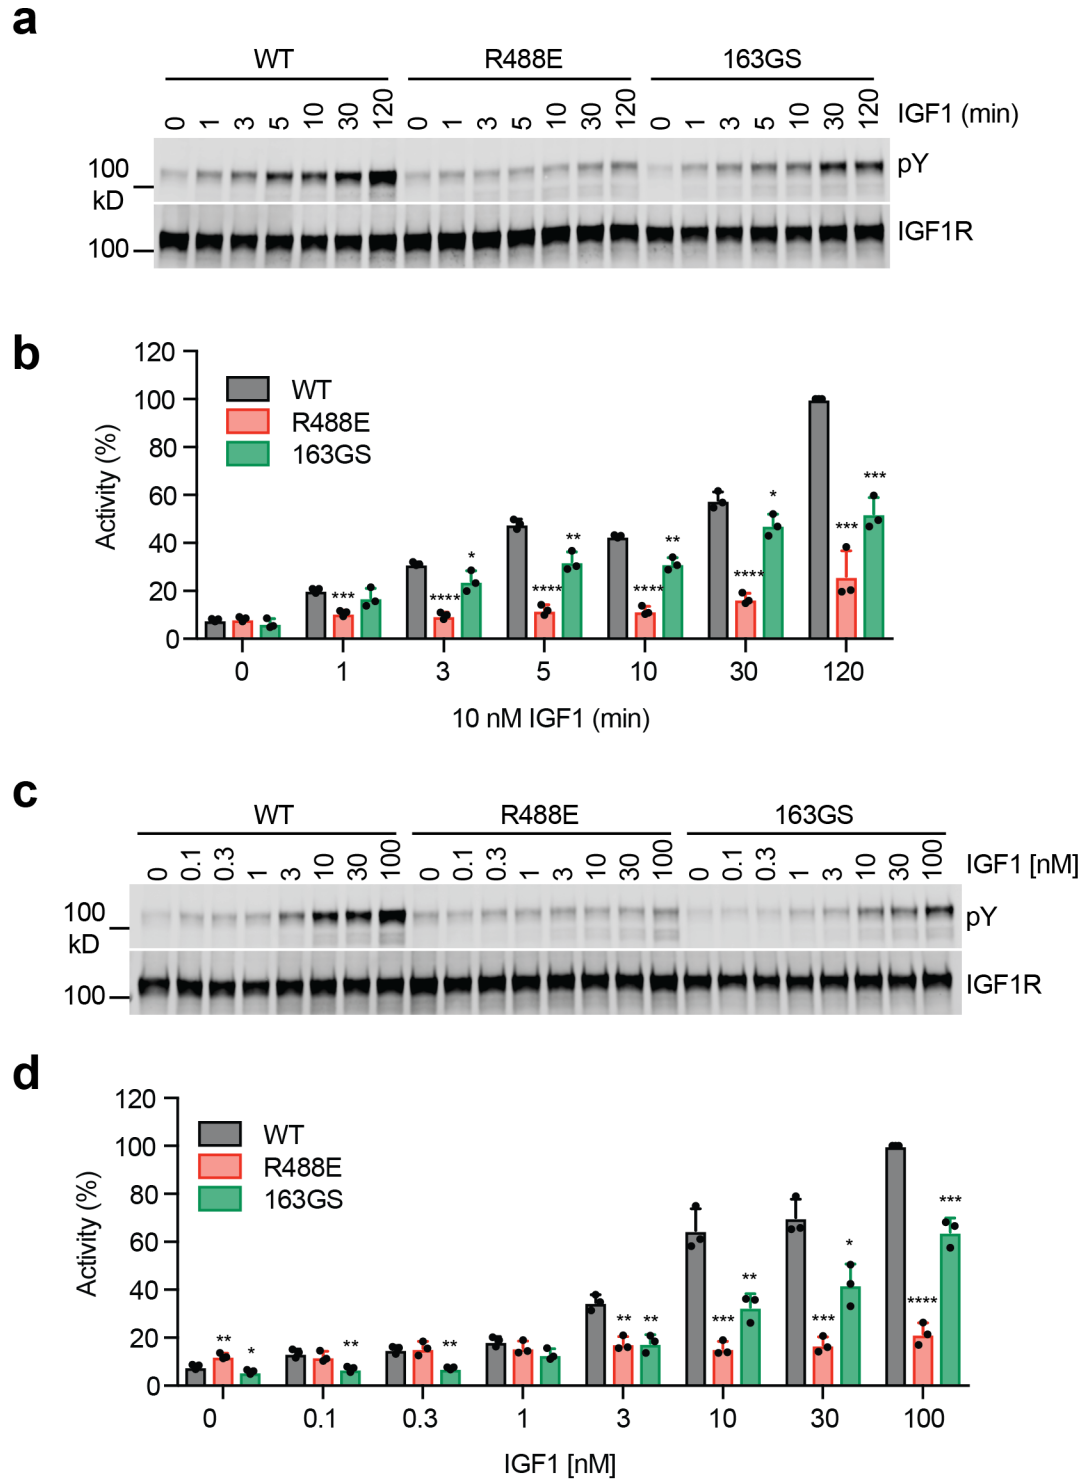

**Supplementary Fig. 6 | Time- and dose-dependency of IGF1R activation by IGF1.** **a**, Western blots of time-dependent IGF1R autophosphorylation in 293FT cells expressing Myc-tagged IGF1R WT or mutants. **b**, Quantification of the Western blot data shown in **a** (Mean  $\pm$

SD). Each experiment was repeated three times. Significance calculated using two-tailed students *t*-test; \**p*<0.05, \*\**p*<0.01, \*\*\**p*<0.001, and \*\*\*\**p*<0.0001. **c**, Western blots of dose-dependent IGF1R autophosphorylation in 293FT cells expressing Myc-tagged IGF1R WT or mutants. **d**, Quantification of the Western blot data shown in **c** (Mean ± SD). Each experiment was repeated three times. Significance calculated using two-tailed students *t*-test; \**p*<0.05, \*\**p*<0.01, \*\*\**p*<0.001, and \*\*\*\**p*<0.0001. Source data are provided as a Source Data file.



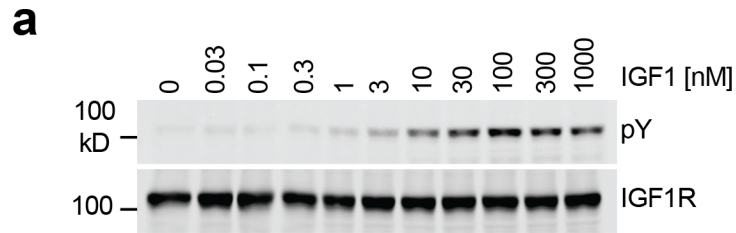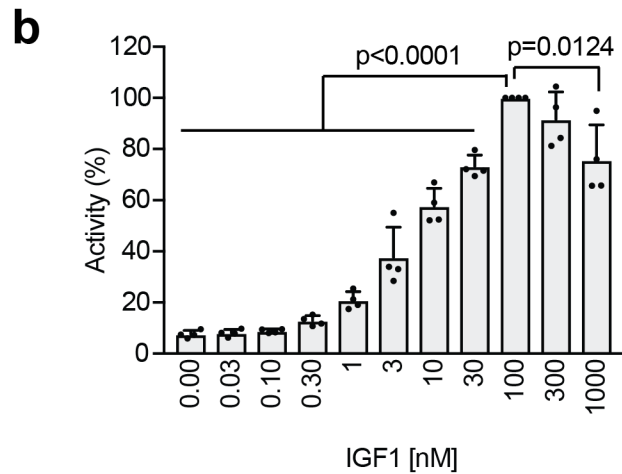

**Supplementary Fig. 7 | Dose-dependency of IGF1R activation by IGF1.** **a**, Western blots of IGF1-dependent IGF1R autophosphorylation in 293FT cells expressing Myc-tagged IGF1R WT. **b**, Quantification of the Western blot data shown in **a** (Mean  $\pm$  SD). Each experiment was repeated four times. Significance calculated using two-tailed students *t*-test. Source data are provided as a Source Data file.

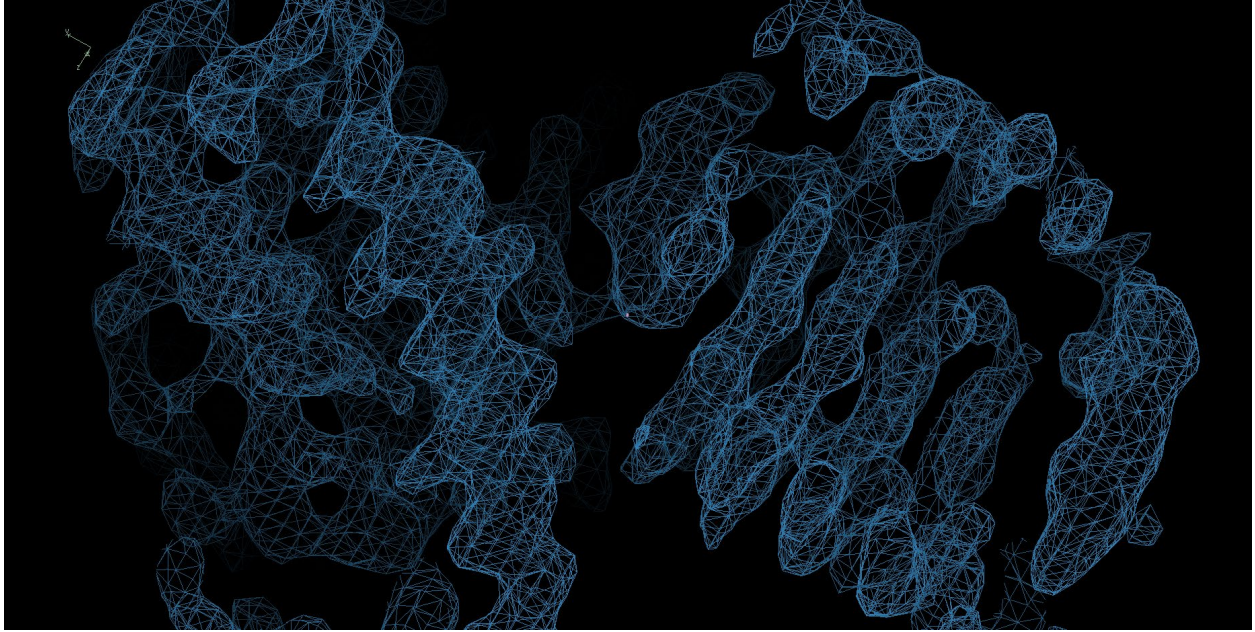

**Supplementary Fig. 8 | A portion of the cryo-EM density displayed at a contour level of 0.025.**

**Supplementary Table 1. List of plasmids.**

| <b>Plasmid name</b>                       | <b>NCBI Reference Sequence Name</b> |
|-------------------------------------------|-------------------------------------|
| pCS2-human IGF1R-WT-Myc                   | NM_000875.5                         |
| pCS2-human IGF1R-WT                       | NM_000875.5                         |
| pCS2-human IGF1R-F701A-Myc                | NM_000875.5                         |
| pCS2-human IGF1R-F701A                    | NM_000875.5                         |
| pCS2-human IGF1R-D1105N-Myc               | NM_000875.5                         |
| pCS2-human IGF1R-R10A-Myc                 | NM_000875.5                         |
| pCS2-human IGF1R-F90A-Myc                 | NM_000875.5                         |
| pCS2-human IGF1R-Y487A-Myc                | NM_000875.5                         |
| pCS2-human IGF1R-R488E-Myc                | NM_000875.5                         |
| pCS2-human IGF1R-N529A-Myc                | NM_000875.5                         |
| pCS2-human IGF1R-D531A-Myc                | NM_000875.5                         |
| pCS2-human IGF1R-P673G4-Myc               | NM_000875.5                         |
| pCS2-human IGF1R-delta 3C-Myc             | NM_000875.5                         |
| pCS2-human IGF1R-K164A-Myc                | NM_000875.5                         |
| pCS2-human IGF1R-Y171A-Myc                | NM_000875.5                         |
| pCS2-human IGF1R-delta 163-174-Myc        | NM_000875.5                         |
| pCS2-human IGF1R-163GS-Myc                | NM_000875.5                         |
| pCS2-human IGF1R-T166A-Myc                | NM_000875.5                         |
| pCS2-human IGF1R-N169A-Myc                | NM_000875.5                         |
| pEZT-BM-mouse IGF1R-1-1262, Y951A, D1107N | NM_010513.2                         |
| pEZT-BM-mouse IGF1R WT                    | NM_010513.2                         |
